# Supplementary material for: Analysis of Putative Apoplastic Effectors from the Nematode, Globodera rostochiensis, and Identification of an Expansin-Like Protein That Can Induce and Suppress Host Defenses
Source: PubMed Central journal article supplement (PMC4301866; doi:10.1371/journal.pone.0115042), 2015-01-21
Supplement: pone.0115042.s002.pdf [file pone.0115042.s002.pdf]

**SP**

GrEXPB1 MSSSEAILCLLCLLAVNFRAQIVLASVTAKLEGKSNNGGGQYVPNEFKNNDGSKIACSVKF 60  
 GrEXPB2 MSCSQLILCLLCLLLVHPNES----- 16  
 \*\*.\*: \*\*\*\*\* \*

**CBD II**

GrEXPB1 SLTPKKGTTIGSVWGANAVSGASNQYTLAPPADIAPGATHNAGVNINGNGAPTLLKLEIA 120  
 GrEXPB2 ----- 20

GrEXPB1 KYFIDDVCGGAPAGSCMGCLSN TKMDGPINKNLNKPFKNSVFTFYGAGGRGACGLDAGVP 180  
 GrEXPB2 -----CMGCLSTTTDGPINQNLNKPFTNGVFTFNEATGRSACGLDAGKP 66  
 \*\*\*\*\*.\*. \*\*\*\*\*:\*\*\*\*\*.\*.\*\*\*\*\* \* \*\*.\*\*\*\*\*\* \*

GrEXPB1 KMSAAGSGNLFKPDGQWVDACRDKRLLDDPICKNICVKIDYNGKTLTVPINNKCPECT 240  
 GrEXPB2 KMSASVSGKLFKSDGQWKNACRIDQQYMLDDPICKNICVKIDYK GKSLTVPINNKCPECP 126  
 \*\*\*\*: \*\*:\*\*\*.\*\*\* :\*\*\* \*: :\*\*\*\*\*:\*\*\*:\*\*\*\*\*.

**DPBB 1**

GrEXPB1 PSHVDLSIDAFNYLEPRGGLVGKATGX-----RSPI----- 271  
 GrEXPB2 PNNVDLSIDAFTYLESR--AVGKATGATLTYLKPSGIKAC 165
