# Supplementary material for: Analysis of Putative Apoplastic Effectors from the Nematode, Globodera rostochiensis, and Identification of an Expansin-Like Protein That Can Induce and Suppress Host Defenses
Source: PubMed Central journal article supplement (PMC4301866; doi:10.1371/journal.pone.0115042), 2015-01-21
Supplement: pone.0115042.s003.pdf [file pone.0115042.s003.pdf]

|                     |                                                                |     |
|---------------------|----------------------------------------------------------------|-----|
| <i>GpExpB2</i> -151 | -----TGCCTTTTACTCGTCCATCCGAACGAA                               | 27  |
| <i>GrExpB2</i> -7g  | -----TGCCTTTTACTCGTCCATCCGAACGAA                               | 27  |
| <i>GrExpB</i> -12b  | -----TGCCTTTTACTCGTCCATCCGAACGAA                               | 27  |
| <i>GrExpB2</i> -1A  | ATGAGCTGCTCCCAATTAATTCTGTGTTGTGTTGCCTTTTACTCGTCCATCCGAACGAA    | 60  |
|                     | *****                                                          |     |
| <i>GpExpB2</i> -151 | TCTTG-----                                                     | 32  |
| <i>GrExpB2</i> -7g  | TCTTGTAAGATAAAATATTAATAAAATTTGATTTTAAATTTTGGATCAATCCCTACCA     | 87  |
| <i>GrExpB2</i> -12b | TCTTG-----                                                     | 32  |
| <i>GrExpB2</i> -1A  | TCTTG-----                                                     | 65  |
|                     | ****                                                           |     |
| <i>GpExpB2</i> -151 | -----CATGGGCTGTCTGTCTCGAG                                      | 50  |
| <i>GrExpB2</i> -7g  | CAATGCCTATAACCCCTATATTATCATTCAATTTTCTAAAGGCATGGGCTGTCTGTCTCGAG | 147 |
| <i>GrExpB2</i> -12b | -----CATGGGCTGTCTGTCTCGAG                                      | 50  |
| <i>GrExpB2</i> -1A  | -----CATGGGCTGTCTGTCTCGAG                                      | 83  |
|                     | *****                                                          |     |
| <i>GpExpB2</i> -151 | CACGACCACGGACGGGCCAATCAACCAGAACCTGAATAAGCCGTTACGAACGGTGTCTT    | 110 |
| <i>GrExpB2</i> -7g  | CACGACCACGGACGGGCCAATCAACCAGAACCTGAATAAGCCGTTACGAACGGTGTCTT    | 207 |
| <i>GrExpB2</i> -12b | CACGACCACGGACGGGCCAATCAACCAGAACCTGAATAAGCCGTTACGAACGGTGTCTT    | 110 |
| <i>GrExpB2</i> -1A  | CACGACCACGGACGGGCCAATCAACCAGAACCTGAATAAGCCGTTACGAACGGTGTCTT    | 143 |
|                     | *****                                                          |     |
| <i>GpExpB2</i> -151 | CACCTTCAACGAAGCCACTGGACGCAGCGCGTGC GGCCCTTGACGCGGGCAAG-----    | 162 |
| <i>GrExpB2</i> -7g  | CACCTTCAACGAAGCCACTGGACGCAGCGCGTGC GGCCCTTGACGCGGGCAAGGTCAGTCA | 267 |
| <i>GrExpB2</i> -12b | CACCTTCAACGAAGCCACTGGACGCAGCGCGTGC GGCCCTTGACGCGGGCAAG-----    | 162 |
| <i>GrExpB2</i> -1A  | CACCTTCAACGAAGCCACTGGACGCAGCGCGTGC GGCCCTTGACGCGGGCAAG-----    | 195 |
|                     | *****                                                          |     |
| <i>GpExpB2</i> -151 | -----                                                          |     |
| <i>GrExpB2</i> -7g  | AGAGTCTCGTTCTGACTATAAAAAAATTGCGCACAAATTGGATCCTGATCAGTTAGACGTT  | 327 |
| <i>GrExpB2</i> -12b | -----                                                          |     |
| <i>GrExpB2</i> -1A  | -----                                                          |     |
| <i>GpExpB2</i> -151 | -----                                                          |     |
| <i>GrExpB2</i> -7g  | AAAATTGCGCACTAAATTGATCAGGTGTTCAATTATGAACTCAACTGTCCTGTTTATGTCT  | 387 |
| <i>GrExpB2</i> -12b | -----                                                          |     |
| <i>GrExpB2</i> -1A  | -----                                                          |     |
| <i>GpExpB2</i> -151 | -----CCCAAAATGTCCGGCATCCGTATCCGGCAAACGTTC AAGTC                | 203 |
| <i>GrExpB2</i> -7g  | TACTGAAAAATTC AATTAGCCCAAAATGTCCGGCATCCGTATCCGGCAAACGTTC AAGTC | 447 |
| <i>GrExpB2</i> -12b | -----CCCAAAATGTCCGGCATCCGTATCCGGCAAACGTTC AAGTC                | 203 |
| <i>GrExpB2</i> -1A  | -----CCCAAAATGTCCGGCATCCGTATCCGGCAAACGTTC AAGTC                | 236 |
|                     | *****                                                          |     |
| <i>GpExpB2</i> -151 | GGACGGGCAATGGAAGAACGCGTGCCCGATAGACCAGCAGTACATGTTGGACGACCCGAT   | 263 |
| <i>GrExpB2</i> -7g  | GGACGGGCAATGGAAGAACGCGTGCCCGATAGACCAGCAGTACATGTTGGACGACCCGAT   | 507 |
| <i>GrExpB2</i> -12b | GGACGGGCAATGGAAGAACGCGTGCCCGATAGACCAGCAGTACATGTTGGACGACCCGAT   | 263 |
| <i>GrExpB2</i> -1A  | GGACGGGCAATGGAAGAACGCGTGCCCGATAGACCAGCAGTACATGTTGGACGACCCGAT   | 296 |
|                     | *****                                                          |     |
| <i>GpExpB2</i> -151 | TTCAAGAACATTTGCGTGAAGATTGACTACAAAGGGAAGAG-----                 | 305 |
| <i>GrExpB2</i> -7g  | TTCAAGAACATTTGCGTGAAGATTGACTACAAAGGGAAGAGGTGCGCAAATTTGTTTGG    | 567 |
| <i>GrExpB2</i> -12b | TTCAAGAACATTTGCGTGAAGATTGACTACAAAGGGAAGAG-----                 | 305 |
| <i>GrExpB2</i> -1A  | TTCAAGAACATTTGCGTGAAGATTGACTACAAAGGGAAGAG-----                 | 338 |
|                     | ** *****                                                       |     |

|                     |                                                                        |      |
|---------------------|------------------------------------------------------------------------|------|
| <i>GpExpB2</i> -151 | -----TCTGACCGTGCCGATCAACAACA                                           | 328  |
| <i>GrExpB2</i> -7g  | ATATTTTAACCTAATCAAAAGTTGCAACCCCTTGAAGTCTGACCGTGCCGATCAACAACA           | 627  |
| <i>GrExpB2</i> -12b | -----TCTGACCGTGCCGATCAACAACA                                           | 328  |
| <i>GrExpB2</i> -1A  | -----TCTGACCGTGCCGATCAACAACA<br>*****                                  | 361  |
| <i>GpExpB2</i> -151 | AGTGCCCGGAATGTCCGCCTAACAAATGTGGATTGTGCGATTGACGCCTTCACCTATATGG          | 388  |
| <i>GrExpB2</i> -7g  | AGTGCCCGGAATGTCCGCCTAACAAATGTGGATTGTGCGATTGACGCCTTCACCTATTTGG          | 687  |
| <i>GrExpB2</i> -12b | AGTGCCCGGAATGTCCGCCTAACAAATGTGGATTGTGCGATTGACGCCTTCACCTATTTGG          | 388  |
| <i>GrExpB2</i> -1A  | AGTGCCCGGAATGTCCGCCTAACAAATGTGGATTGTGCGATTGACGCCTTCACCTATTTGG<br>***** | 421  |
| <i>GpExpB2</i> -151 | AGTCCCGTGCCTGTGGGCAAAGCAACGGG-----                                     | 416  |
| <i>GrExpB2</i> -7g  | AGTCCCGTGCCTGTGGGCAAAGCAACGGGTTAGAATTACATATGTCGTTATGATTGATTTA          | 747  |
| <i>GrExpB2</i> -12b | AGTCCCGTGCCTGTGGGCAAAGCAACGGG-----                                     | 416  |
| <i>GrExpB2</i> -1A  | AGTCCCGTGCCTGTGGGCAAAGCAACGGG-----<br>*****                            | 449  |
| <i>GpExpB2</i> -151 | -----                                                                  |      |
| <i>GrExpB2</i> -7g  | TACGGGGAGGGGGCGTAAATAATAATCCGGGACTCGTCGTC AAGACAAAAAAAATAGC            | 807  |
| <i>GrExpB2</i> -12b | -----                                                                  |      |
| <i>GrExpB2</i> -1A  | -----                                                                  |      |
| <i>GpExpB2</i> -151 | -----                                                                  |      |
| <i>GrExpB2</i> -7g  | ACCGGTATCGGCAGGACTAAAAGCTTAGGATTTTCTAACCTTCCGGGCTGGGGATTTGTT           | 867  |
| <i>GrExpB2</i> -12b | -----                                                                  |      |
| <i>GrExpB2</i> -1A  | -----                                                                  |      |
| <i>GpExpB2</i> -151 | -----                                                                  |      |
| <i>GrExpB2</i> -7g  | TAGTGATCAAAGAGCCTAAATTTATTGAATTTTAATCGATCAAGACAATATGCCGGCATT           | 927  |
| <i>GrExpB2</i> -12b | -----                                                                  |      |
| <i>GrExpB2</i> -1A  | -----                                                                  |      |
| <i>GpExpB2</i> -151 | -----                                                                  |      |
| <i>GrExpB2</i> -7g  | TCTCTGTATTTAATTTTTTACAAATTTATATCAGATTTAATTGTCTTAATTAGAAAAGT            | 987  |
| <i>GrExpB2</i> -12b | -----                                                                  |      |
| <i>GrExpB2</i> -1A  | -----                                                                  |      |
| <i>GpExpB2</i> -151 | -----CGCTACGCTCACCTATTTAAAATGTCCGTCGGGCATC                             | 453  |
| <i>GrExpB2</i> -7g  | GATGAAATACAAATTATTTTAGGCGCTACGCTCACCTATTTAAAATGTCCGTCGGGCATC           | 1047 |
| <i>GrExpB2</i> -12b | -----CGCTACGCTCACCTATTTAAAATGTCCGTCGGGCATC                             | 453  |
| <i>GrExpB2</i> -1A  | -----CGCTACGCTCACCTATTTAAAATGTCCGTCGGGCATC<br>*****                    | 486  |
| <i>GpExpB2</i> -151 | AAAGCTTGCTGAAAATTTGGGGCGTGAAAAATTTGACAATGACAAGTCGATCAATTCAT            | 513  |
| <i>GrExpB2</i> -7g  | AAAGCTTGCTGAAAATTTGGGGCGTGAAAAATTTGACAATGACAAGTCGATCAATTCAT            | 1107 |
| <i>GrExpB2</i> -12b | AAAGCTTGCTGAAAATTTGGGGCGTGAAAAATTTGACAATGACAAGTCGATCAATTCAT            | 513  |
| <i>GrExpB2</i> -1A  | AAAGCTTGCTG-----<br>*****                                              | 498  |
| <i>GpExpB2</i> -151 | TATTTTATTGCTAGCCAATTTATTCGACA                                          | 543  |
| <i>GrExpB2</i> -7g  | TATTTTATTGCTAGCCAATTTATTCGACA                                          | 1137 |
| <i>GrExpB2</i> -12b | TATTTTATTGCTAGCCAATTTATTCGACA                                          | 543  |
| <i>GrExpB2</i> -1A  | -----                                                                  |      |

**Figure S3A:**

```

GrEXPB2-7g      -----CLLLVHPNESCMGCLSSTTTDGPINQNLNKPFTNGVFTFNEATGRSACG 49
GrEXPB2-12b    -----CLLLVHPNESCMGCLSSTTTDGPINQNLNKPFTNGVFTFNEATGRSACG 49
GrEXPB2-1A     MSCSQLILCLLCLLLVHPNESCMGCLSSTTTDGPINQNLNKPFTNGVFTFNEATGRSACG 60
GpEXPB2-151    -----CLLLVHPNESCMGCLSSTTTDGPINQNLNKPFTNGVFTFNEATGRSACG 49
                *****

GrEXPB2-7g      LDAGKPKMSASVSGKLFKSDGQWKNVCRIDQQYMLDDPICKNICVKIDYKGKSLTVPINN 109
GrEXPB2-12b    LDAGKPKMSASVSGKLFKSDGQWKNACRIDQQYMLDDPICKNICVKIDYKGKSLTVPINN 109
GrEXPB2-1A     LDAGKPKMSASVSGKLFKSDGQWKNACRIDQQYMLDDPICKNICVKIDYKGKSLTVPINN 120
GpEXPB2-151    LDAGKPKMSASVSGKLFKSDGQWKNACRIDQQYMLDDPICKNICVKIDYKGKSLTVPINN 109
                *****

GrEXPB2-7g      KCPECPPNNVDLSIDAFTYLESRAVGKATGATLTYLKCPSPGIKAC 154
GrEXPB2-12b    KCPECPPNNVDLSIDAFTYLESRAVGKATGATLTYLKCPSPGIKAC 154
GrEXPB2-1A     KCPECPPNNVDLSIDAFTYLESRAVGKATGATLTYLKCPSPGIKAC 165
GpEXPB2-151    KCPECPPNNVDLSIDAFTYLESRAVGKATGATLTYLKCPSPGIKAC 154
                *****

```

**Figure S3 B**
