# Supplementary material for: Analysis of Putative Apoplastic Effectors from the Nematode, Globodera rostochiensis, and Identification of an Expansin-Like Protein That Can Induce and Suppress Host Defenses
Source: PubMed Central journal article supplement (PMC4301866; doi:10.1371/journal.pone.0115042), 2015-01-21

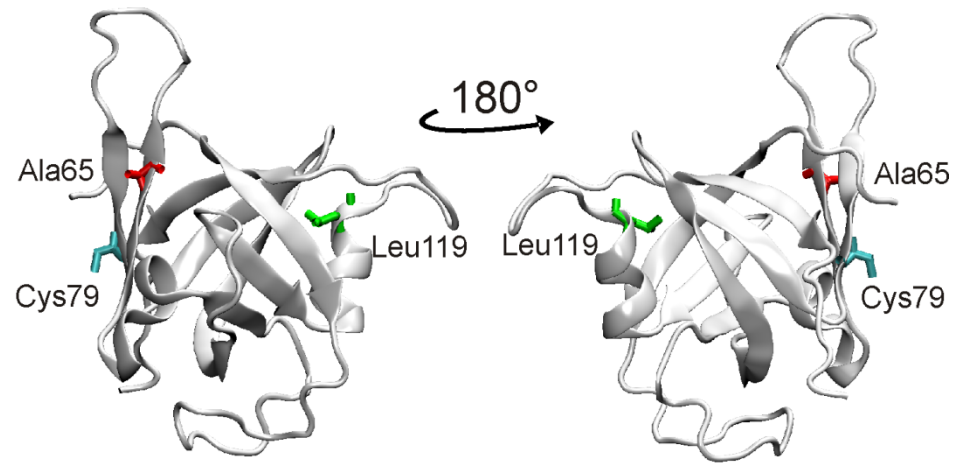

Supplement: pone.0115042.s004.pdf [file pone.0115042.s004.pdf]
