# Supplementary material for: Analysis of Putative Apoplastic Effectors from the Nematode, Globodera rostochiensis, and Identification of an Expansin-Like Protein That Can Induce and Suppress Host Defenses
Source: PLoS One. 2015 Jan 21;10(1):e0115042. doi: 10.1371/journal.pone.0115042 (PMC4301866; doi:10.1371/journal.pone.0115042)
Supplement: S2 Table — (XLS) [file pone.0115042.s007.xls]

## Sheet: Feuil1
Effector	PCR amplification	Sequence variation from NCBI	Sequence when different from NCBI
GrCLE-4A (EU386831.1)	Infected roots	Nonsynonymous	ATGGCCAAGAACGCAATGCTTTGCCTGTTTGTTATAAGCGTTGTTCTCGCTCTCGCATTTGCTACGAATAAAAAGGGTGATGAAGAACCGGAGAACCATTCGACCGGCATTTTTGGAAAGGTCGGACGAGTTGTGACCGTGGCACTTGCGATGTCGTCTCGTCTGGGAGGGGCTGACGCAACCCGAGGAGGTGGAGCTGTATATGGAGGAAACTTGAAATCCAATCAATTGCCAAACAACAATTGGATGGCGCCACCTCCTCCAATGGCAATAAGAAGTGCCAAAGTCTATGATTCGAAACATTCTCCTGCTGAATATCTTAAAAAATTTGCCCAAGACTTTCGCCGAAAAACCGGCATGCACTCCCAGCGGCATCACGAAGAAACAACACTGGAACAG…
GrCLE-4B (EU386834.1)	Not amplified	Probable allele of GrCLE4B-1: 5 nucleotide differences (3 aa differences), No difference in primer binding sites
GrCLE-4C (EU386836.1)	Infected roots	No difference
GrCLE-4A-3 (EU386833.1)	Not amplified	Probable allele of GrCLE4D: 30 nucleotide differences (17 aa differences), No difference in primer binding sites
GrCLE-1 (EU386830.1)	Infected roots	No difference
GrCLE-4D (EU386844.1)	Infected roots	No difference
GrCLE-4B1 (EU386835.1)	Infected roots	Nonsynonymous in SP but No mutation detected in mature protein	(GenBank: KF963515.1) ATGGCCGCGAACACAATGCTTTGCCTGTTAATTTTGAGCGTTGTTCTCGCTCTCGCATTTGCTACGAATAAAAAGGGTGATGAAGAACCGGAGAACCATTCGACCGGCATTTTTGGAAAGGTCGGACGAGTTGTGACCGTGGCACTTGCGATGTCGTCTCGTCTGGGAGGGGCTGACGCAACCCGAGGAGGTGGAGCTGTATATGGAGGAAACTTGAAATCCAATCTATTGCCAAACAACAATTGGATGGCGCCACCTCCTCCAATGGCAATGAGAAGTGCCAAAGTCTATGATTCGAAACATTCTCCTGCTGAATATCTTAAAAAATTTGCTCAAGACTTTCGCCGAAAAACCGGCATGCACTCCCAGCGGCATCA…
GrENG-1 (AF056110.1)	Pre-J2	Nonsynonymous	(GenBank: KF963516.1) ATGAGTCGACTCCAGTCTCTGTTCTTTCAAGTTTTCCTCCTCCATGGCCTGCACATTGTGTTCTGTAACGCTCTGACTGCCACGCCGCCCCCATACGGGCAACTGTCCGTCTCCGGCACCAAATTGGTCGACTCCAGCGGACAAGCCGTTCAGCTGATCGGAAATTCGCTGTTCTGGCACCAATTTCAATCACAGTACTGGAATGCCGAAACAGTAAAGGCGCTCAAATGCAATTGGAACGCAAACGTCGTGAGGGCGGCCGTGGGCGTGGACTTGGAGCGCGGCTATATGAGCGACCCGACCACCGCTTACAATCAGGCGGTTGCCGTCATCGAGGCGGCCATTTCCCAGGGCATGTACGTGATCGTTGATTGGCA…
GrENG-2 (AF004716.1)	Pre-J2	Nonsynonymous	(GenBank: KF963516.1) ATGAGTCGACTCCAGTCTCTGTTCTTTCAAGTTTTCCTCCTCCATGGCCTGCACATTGTGTTCTGTAACGCTCTGACTGCCACGCCGCCCCCATACGGGCAACTGTCCGTCTCCGGCACCAAATTGGTCGACTCCAGCGGACAAGCCGTTCAGCTGATCGGAAATTCGCTGTTCTGGCACCAATTTCAATCACAGTACTGGAATGCCGAAACAGTAAAGGCGCTCAAATGCAATTGGAACGCAAACGTCGTGAGGGCGGCCGTGGGCGTGGACTTGGAGCGCGGCTATATGAGCGACCCGACCACCGCTTACAATCAGGCGGTTGCCGTCATCGAGGCGGCCATTTCCCAGGGCATGTACGTGATCGTTGATTGGCA…
GrENG-3 (AF408154.1)	Pre-J2	Nonsynonymous	(GeneBank: KF963518.1) ATGAGTCGACTCCAGTCTCTGTTCTTTCAAGTTTTCCTCCTCCATGGCCTGCACATTGTGTTCTGTAACGCTCTGACTGCCACGCCGCCCCCATACGGGCAACTGTCCGTCTCCGGCACCAAATTGGTCGACTCCAGCGGACAAGCCGTTCAGCTGATCGGAAATTCGCTGTTCTGGCACCAATTTCAATCACAGTACTGGAATGCCGAAACAGTAAAGGCGCTCAAATGCAATTGGAACGCAAACGTCGTGAGGGCGGCCGTGGGCGTGGACTTGGAGCGCGGCTATATGAGCGACCCGACCACCGCTTACAATCAGGCGGTTGCCGTCATCGAGGCGGCCATTTCCCAGGGCATGTACGTGATCGTTGATTGGC…
GrENG-4 (AF408156.1)	Not amplified	Probable allele of GrENG3: 9 nucleotide differences between GrENG3 and GrENG4 (4 aa differences)	ATGTGCGCTTTGATTTATGCCGTTTTACCCCTGCTTCTCGTGCTGATCGCCGATCATTCTAAGATCGGCGCTGTCACAGCCCCTCCCTATGGCCCATTGGCTGTCAATGGAAAATTCCTTGTCCAAAAGAGTACAAAAAAGACGGTGAAATTGCACGGACTCTCACTGTATTGGAGCCAGTGGCAACCGCGCTTTTGGGTGGCAGAAACGGTCAATCGAATTAAATGCGGCTGTAACAGCAATGTTGTGCGTGCCGCAATGGGCACTCAGAGAAGCTTCGGAGGATATGTTGCCAATCCGGCCGCGGAATATGCCAAAATGAAGACAATCATCGAAGCAGCGTTGGACCAGGGCATTTATGTTATCGTTGATTGGCACACCGGGGACGATTTGGCCACC…
GrEXPB1 (AJ311901.1)	Pre-J2	No difference	ATGAGCTCCTCTGAAGCAATTCTGTGTTTGTTGTGCCTTTTGGCCGTCAATTTCCGTGCCCAAATCGTTTTGGCCAGTGTTACGGCCAAGTTAGAAGGAAAATCTTGGAACGGAGGTGGCCAATACGTGCCGAACTTCAAGAACAATGACGGCTCCAAAATCGCGTGTTCCGTCAAATTCTCGTTGACGCCAAAGAAAGGAACGACCATCGGAAGCGTATGGGGCGCTAACGCGGTCAGCGGCGCCTCCAACCAGTACACGTTGGCCCCCCCTGCCGACATTGCGCCGGGCGCAACGCATACAAATGCCGGAGTGAACATCAACGGAAACGGCGCGCCCACCCTTAAACTGATCGAAGCCAAATACTTCATCGACGATGTCTGTGGCGGAGCTCCGGCC…
GrEXPB2 (AJ311902.1)	Pre-J2	No difference
GrEXP1 (AJ556781.1)	Not amplified	Probable alternative splice variant of EXPB1 (continuous stretch of 30 bp is missing)
GrEFTU1 precursor (AB211995.1)	Not amplified
GrVAP2	Not amplified
GrVAP1 (JX026923.1)	Pre-J2	Synonymous	(GenBank: KF963519.1) ATGGCATTTGCCCCAACAATTTCTGTTCTCTGTTTGCTGCTCATTGCGCTCTCAGAAATGCCATTCTCCGTTTTGGCACTTTCTGCGTCCAGCCGCGTGTCGGTGCTCGCGTGCCACAACAACTACCGCTCAACGCTGGCCAAGGGCACCGCGGCAAACCTCACCGGTACGATGCCGGCCGGCAGCAATTTGATCCAGCAAAAGTACAGCACAAGCGCTGAGACGACAGCCCAAAACTGGGCCAACGGATGCTCAATGGCACATTCGAGCTCGTCGAGCAGAAACGGCATGGGCGAAAACTTGTACATGACCAGCTCATCGACGATCACCGAAGCGGATGCCCTGAAGCAGGCATGCGACATGTGGTGGGCGGAGTT…
GrPEL1 (AF127915.1)	Pre-J2	Synonymous	(GenBank: KF963520.1) ATGCTTTTTGTTATCATTTCAATAGTTTTTGCCCAAATTTTCCAAGTGCATGCGCTGTGCACCTTTCCTTCATCGACCAAAACCATCACAGTACAAGCAACAATGAATGTTGCTTCGAACACTGACTACAAATACACCACTTTTGTTGGCGGTTCCGGCATTCTAAACGGCGCCTGTGATGTGAAGAACGGCAAGATGAAATATTTGATGGTTTTGAAGCACGGCGTCACCATTAAAAATGCCATAATCAACACTCCTGGCTTGGGCATTTACTGCGAGGGCAGTTGCGTGCTCGAAAACATTTACTACAAAAAACTTTGCTATCACGCTACTGGGTTCGGATACAAAAGCACTGGCACTTCCTACACATATCAAGT…
GrPEL2 (AY094613.1)	Pre-J2	Nonsynonymous	(GenBank: KF963521.1) ATGCTGCACCATTTATTCGTTCTTTGCTTCTTTTTTGCCAATTTGACTCTGATATTTGCAAATTGGCCCACCGCGACGGGCGATGAGACAGTCCCTGAGACAATAATAATTGTCGGCGGGATCAAAGACTTCAAATTCAAACGTTTGAGCGCTTCATTAGCATTGGGCACAGGCGACCAACATGAGGACCAAAAAGCGATTATTCGTGCCGAAAAGGGGGCGGTGATCAAAAATTTGATTATCGGCAAAAATGGTGCCGACGGCATTCATTGTTACGATAGTTGTACTTTGGAGAATGTTTGGTTCGAGTCCGTTGGCGAAGATGCGACAACGTTTCGGACCAGCAAGGATTGTGGCGCCGGATCATTTGTCGTCAC…
GrMTP (AY426767.1)	Pre-J2	Synonymous	(GenBank: KF963522.1) ATGCATTACGCCAAATTATTTTTTGTTATTTTGCCAATTTTCCTCCTCCACCCCGAACAATCCAATGGCTGCTTTTCACGTGGCAACAGCGGCAACCCGTCCGATGGCAACCCGGAGGCGCAGGGATTAAAGTCGGAAAACGATGTTCGCGTGGACCATTTGAAGGAGCCGAAGCCGGCCGAGTTGGGCGGCGGCGTCCAGGGCGAAGAGGACGACGAAAAAAGTACGGCGGCACAAAAAGTGCCGTCCGCTCCCAATTTGGACTTGGACCCCGACTTTGTTAAGGCTTATCTGAAGGAATTTGGTCACATGAAGCATGCCGATGATGGCCCTGTTCAGGGCGTTAAGCATTTCCAAGAATTTTTGGGCATTCAACA…
Gr GPX2 (KF963523.1)	Pre-J2	Nonsynonymous	(GenBank: KF963523.1) ATGCTTTTTTATAATGCCAACTTTGTACAAAAAAGCAGGCTTCAGAACCATGCATCTTTGCTGATTCCTTTCCTGCTTTTTGGAGTGACTTTTTCTGTCGAAAAGTTTAAGCCACAGGCTCAACCCAAACAGGACAAATACCAACCCGGTCCTAAACTGATTGATGAGACGACTCGATGGAGTAAATGCAAGTCGGATCAGAACATGACGATCTACGACTTTGAGGTGGATACGTTGGATGGCAACTACACCAACTTGGAGAAGTTCAAAGGACAGGTTCTTCTCGTCATAAATGTGGCCACATTCTGTGCTTACACGCAGCAGTACATCGACTTCAATCCGCTGATCGAAAATAACATCGCCAACGGAAACCAGTT…
GrAMS1 (AJ270995.1)	Pre-J2	Nonsynonymous	(GenBank: KF963524.1) ATGCAATTTTCTTTCATTATTCTGTCTTCTTTTTGCCTGTACGTTGGCGCATTGCCCCGCCTCAATGAACTGCATTATAAGGCGAAACATGGGGGCGAACGTGGACAAAAAAGTGATGCGCAACCGCAACAAATGCCGCGTCGTCTTCCATTTCCGAGACCAGGGCCAATGCCGGAATATTTACAAGATGCCAGCGAGAAAGCGCAATTTGAATACCAACAAATGTTCGCGGAGGACAATGGACAAACGCCGAAGGGGGAATTGAAGGCAAAGCTGGCAAAATGGGCGGAAAGCAACGGGATGAAGAAGGAATTCGACATGCACCAGGAAGAATATCAGCGAAAGAAGGAGGCCTTTCACAAATTAATGACTGCAAA…
GrGPX (AJ493677.1)	Pre-J2	Nonsynonymous	(GenBank: KF963525.1) ATGATTTCATTTTTGCTGATTCCTTTCCTGCTTTTTGGAGTGACTTTTTCTGTCGAAAAGTTTAAGCCACAGGCTCAACCCAAACAGGACAAATACCAACCCGGTCCTAAACTGATTGATGAGACGACTCGATGGAGTAAATGCAAGTCGGATCAGAACATGACGATCTACGACTTTGAGGTGGATACGTTGGATGGCAACTACACCAACTTGGAGAAGTTCAAAGGACAGGTTCTTCTCGTCATAAATGTGGCCACATTCTGTGCTTACACGCAGCAGTACATCGACTTCAATCCGCTGATCGAAAAGAACATCGCCAACGGAAACCAGTTCTCTATCCTAGCCTTTCCATGCAATCAGTTCTACCTGCAGGAACC…
GrSXP (AJ271910.1)	Pre-J2	No difference
GrA42 (AJ536823.1)	Pre-J2	No difference
GrUBCEP12 (JX308827.1)	Pre-J2	No difference
GrSKP1	Pre-J2	Synonymous	(GeneBanK: KF963526.1) ATGGCAACGACAAAATCTTTTTTGAAGTCAAATGACGATGAAGTGTTCGAGGTCGACCGCGGCGTGATCCGTCTTTCCACCACTTTGAACACAATGTTTCAAGATCTTGGCATGGACCAAGCCGAAGCCGGCGACAAAATGTTCTCGGACCCGATTCCACTTGCGAATGTCAATGGAGCAATTCTGCGCAAAGTGATAGCCTGGTGCCAACATCACAAGGATGATGCTCCGGTTGGGGATGATGCGGAGAGCAAGGAACGTCGAACTGACGATATTCCGAGTTGGGATGTGGAATTTTTGAAGGTCGACCAAGGAACTCTTTTTGAACTGATTTTGGCAGCTAATTACTTGGACGTGCGCGTTTTGCTGGACGTTG…
Gr4D06	Pre-J2	No difference
GrTPX (AJ243736.1)	Pre-J2	Synonymous	(GenBank: KF963527.1) ATGTCTTCCAACTCAAAGGCATTCATCGGTAAGCCAGCACCCAAGTTCAGTGCTGATGCGGTGGTAAACGGCGACTTCAAGACAATTTCCTTGGACGACTACAAGGGGAAATATGTGGTGCTATTCTTCTACCCGCTCGATTTCACTTTCGTTTGCCCAACCGAAATAATTGCTTTCTCTGACCGTGCTGACGAATTCAAGAAGATCGACACTCAGCTTATTGCGTGTTCAACCGATTCCAAATTTAGTCACCTTGAATGGATCAACAAACCGCGAAAGCATGGCGGACTGGGCGAGATGAAAATTCCGGTATTGGCAGACACCAACCACAAAATCAGCCGCGACTACGGAGTGTTGATGGAAGAAGCTGGCATTGC…
